# Supplementary material for: Effect of Previous Frozen Storage and Coating Medium on the Essential Macroelement and Trace Element Content of Canned Mackerel
Source: MDPI journal article supplement (doi:10.3390/foods12122289), 2023-06-06
Supplement: s1 [file s1]

**TABLE S1**

Accuracy control of the analytical procedure for the determination of macroelements and trace elements in initial and canned samples corresponding to Groups I and II\*. Certified reference material DORM-2 (National Research Council of Canada, NRCC) was employed for trace elements. In the case of macroelements, contents come from Engstrom et al. [26] and Millos et al. [27].

| Element               | Certified                      | Initial and<br>Group I samples | Group II<br>samples            |
|-----------------------|--------------------------------|--------------------------------|--------------------------------|
| <b>MACROELEMENTS</b>  | $\text{g}\cdot\text{kg}^{-1}$  | $\text{g}\cdot\text{kg}^{-1}$  | $\text{g}\cdot\text{kg}^{-1}$  |
| Ca [26]               | $0.620 \pm 0.050$              |                                | $0.650 \pm 0.045$              |
| Ca [27]               | $0.485 \pm 0.043$              | $0.465 \pm 0.015$              |                                |
| K [26]                | $18.9 \pm 1.1$                 |                                | $18.10 \pm 0.29$               |
| K [27]                | $14.42 \pm 0.29$               | $13.30 \pm 0.35$               |                                |
| Mg [26]               | $1.050 \pm 0.050$              |                                | $0.970 \pm 0.020$              |
| Mg [27]               | $1.024 \pm 0.085$              | $0.980 \pm 0.025$              |                                |
| Na [26]               | $5.06 \pm 0.07$                | $4.45 \pm 0.12$                | $4.75 \pm 0.10$                |
| Na [27]               | no data                        |                                |                                |
| P [26]                | $9.92 \pm 0.14$                |                                | $10.00 \pm 0.22$               |
| P [27]                | $10.11 \pm 0.23$               | $9.35 \pm 0.20$                |                                |
| S [26]                | $8.92 \pm 0.49$                |                                | $8.90 \pm 0.20$                |
| S [27]                | $7.96 \pm 0.27$                | $8.39 \pm 0.30$                |                                |
| <b>TRACE ELEMENTS</b> | $\text{mg}\cdot\text{kg}^{-1}$ | $\text{mg}\cdot\text{kg}^{-1}$ | $\text{mg}\cdot\text{kg}^{-1}$ |
| Co                    | $0.18 \pm 0.03$                | $0.17 \pm 0.01$                | $0.16 \pm 0.01$                |
| Cu                    | $2.34 \pm 0.16$                | $2.17 \pm 0.19$                | $2.19 \pm 0.14$                |
| Fe                    | $142 \pm 10$                   | $141 \pm 7$                    | $125 \pm 5$                    |
| Mn                    | $3.66 \pm 0.34$                | $3.47 \pm 0.17$                | $3.36 \pm 0.13$                |
| Se                    | $1.40 \pm 0.09$                | $1.33 \pm 0.06$                | $1.41 \pm 0.19$                |

\* Data expressed as average content  $\pm$  standard deviation ( $n = 5$ ).
